# Supplementary material for: Ultrathin tungsten-doped hydrogenated titanium dioxide nanosheets for solar-driven hydrogen evolution
Source: Royal Society of Chemistry journal article supplement (doi:10.1039/d2qi00978a), 2022-01-01
Supplement: d2qi00978a1.pdf [file d2qi00978a1.pdf]

## Electronic Supplementary Information

### **Ultrathin tungsten-doped hydrogenated titanium dioxide nanosheets for solar-driven hydrogen evolution**

Xiaoyu Chen, Zhi Han, Bojing Sun, Yu Wang, Xijiang Han\*, and Ping Xu\*

MIIT Key Laboratory of Critical Materials Technology for New Energy Conversion and Storage, School of Chemistry and Chemical Engineering, Harbin Institute of Technology, Harbin 150001, China

Email: pxu@hit.edu.cn (P.X.); hanxijiang@hit.edu.cn (X.H.)

## Contents

|                  |                                                                                                                               |   |
|------------------|-------------------------------------------------------------------------------------------------------------------------------|---|
| <b>Fig. S1</b>   | Optical photos of W-h-TiO <sub>2</sub> and h-TiO <sub>2</sub> nanosheets.                                                     | 3 |
| <b>Fig. S2</b>   | XRD pattern and TEM image of W <sub>2</sub> C nanoparticles.                                                                  | 3 |
| <b>Fig. S3</b>   | AFM images and corresponding height profiles of W-h-TiO <sub>2</sub> nanosheets and h-TiO <sub>2</sub> nanosheets.            | 4 |
| <b>Fig. S4</b>   | Full XPS scan spectra of W-h-TiO <sub>2</sub> nanosheets.                                                                     | 4 |
| <b>Fig. S5</b>   | W 4d XPS spectra of W-h-TiO <sub>2</sub> nanosheets.                                                                          | 5 |
| <b>Fig. S6</b>   | C 1s XPS spectra of W-h-TiO <sub>2</sub> nanosheets.                                                                          | 5 |
| <b>Fig. S7</b>   | Optical bandgap of pure h-TiO <sub>2</sub> and W-h-TiO <sub>2</sub> nanosheets.                                               | 5 |
| <b>Fig. S8</b>   | Mott-Schottky plots under different frequency of W-h-TiO <sub>2</sub> nanosheets and pure h-TiO <sub>2</sub> nanosheets.      | 6 |
| <b>Fig. S9</b>   | UPS spectra of h-TiO <sub>2</sub> and W-h-TiO <sub>2</sub> nanosheets.                                                        | 6 |
| <b>Fig. S10</b>  | H <sub>2</sub> evolution rates of W-h-TiO <sub>2</sub> nanosheets under constant temperature of 25 °C.                        | 7 |
| <b>Fig. S11.</b> | H <sub>2</sub> evolution rates of W-h-TiO <sub>2</sub> nanosheets with 0.5wt% H <sub>2</sub> PtCl <sub>6</sub> as cocatalyst. | 7 |
| <b>Table. S1</b> | Actual molar ratio of W to Ti in W-h-TiO <sub>2</sub> nanosheets measured by ICP-OES.                                         | 8 |
| <b>Table. S2</b> | Time-resolved PL decay curve parameters obtained by double-exponential function simulation.                                   | 8 |
| <b>Table. S3</b> | Photocatalytic hydrogen production performance of photocatalysts reported in literatures.                                     | 8 |

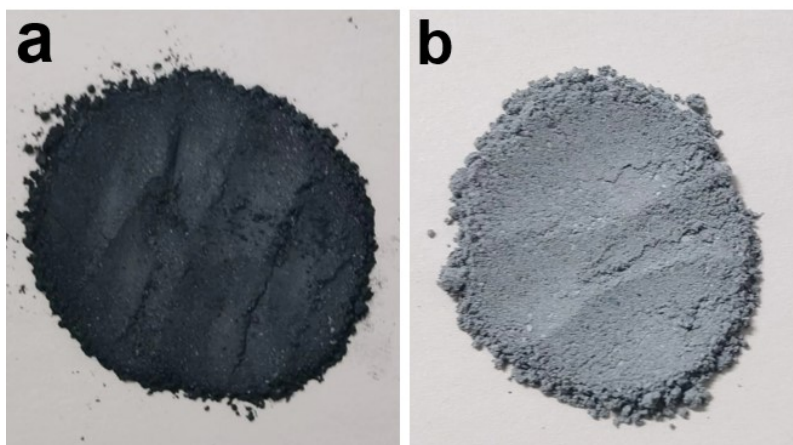

**Fig. S1.** Optical photos of (a) W-h-TiO<sub>2</sub> nanosheets and (b) h-TiO<sub>2</sub> nanosheets.

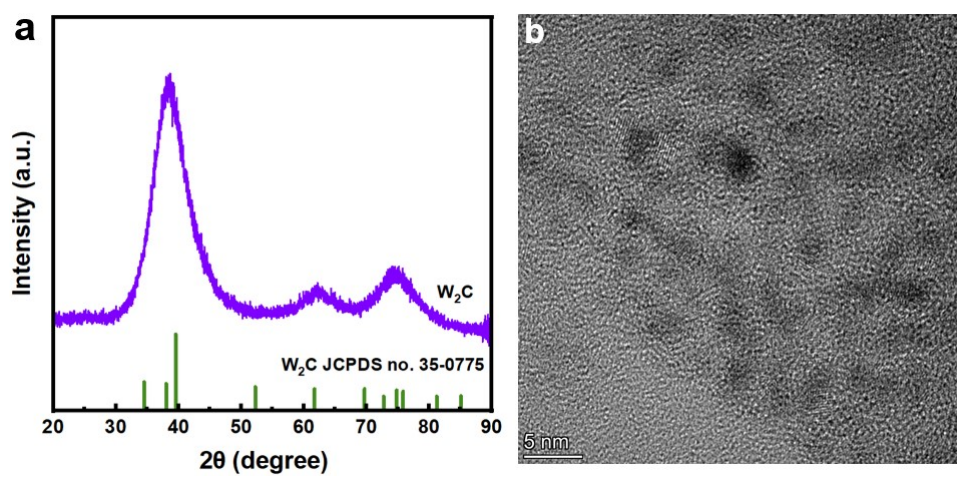

**Fig. S2.** (a) XRD pattern and (b) TEM image of W<sub>2</sub>C nanoparticles.

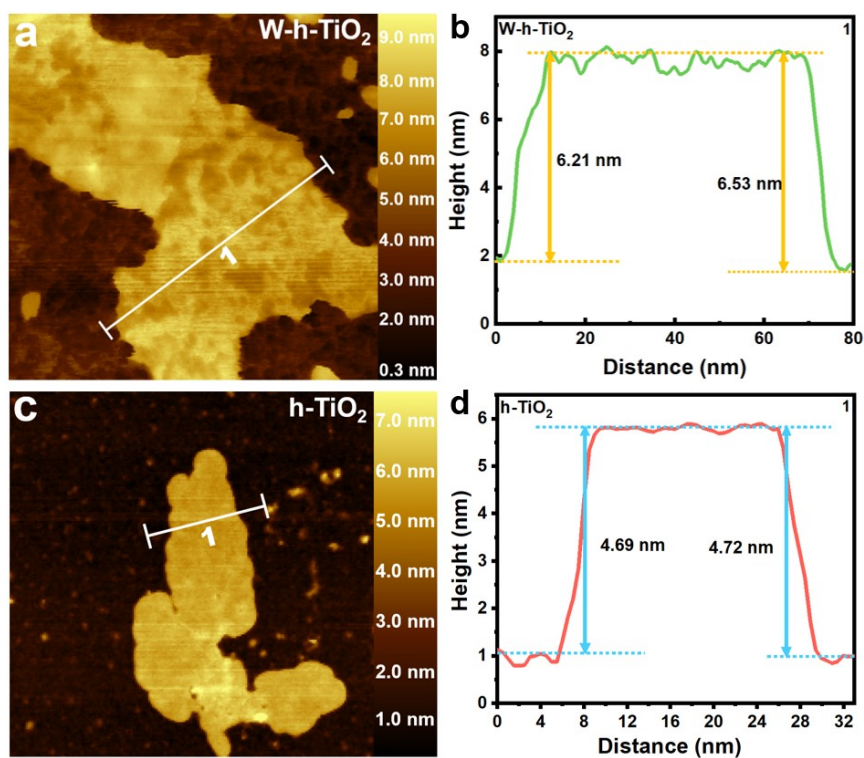

Fig. S3. (a, c) AFM images and (b, d) corresponding height profiles of W-h-TiO<sub>2</sub> nanosheets and h-TiO<sub>2</sub> nanosheets.

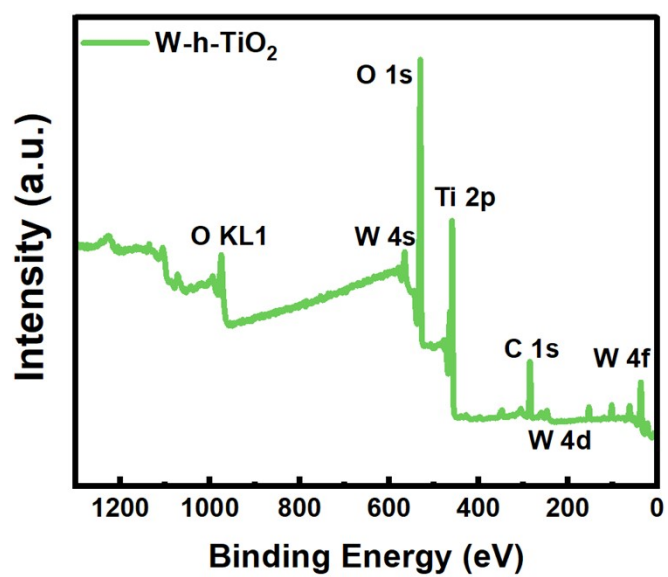

Fig. S4. Full XPS scan spectrum of W-h-TiO<sub>2</sub> nanosheets.

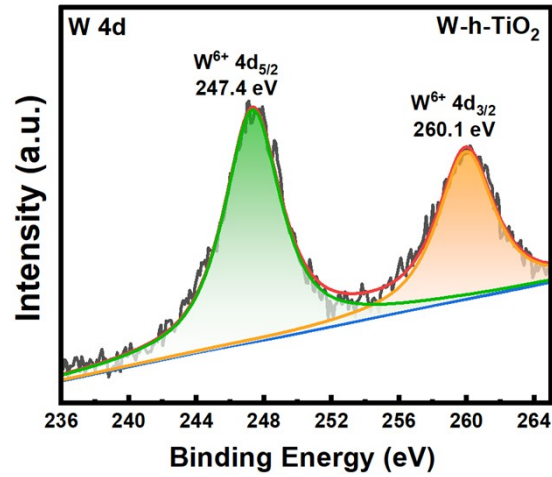

Fig. S5. W 4d XPS spectrum of W-h-TiO<sub>2</sub> nanosheets.

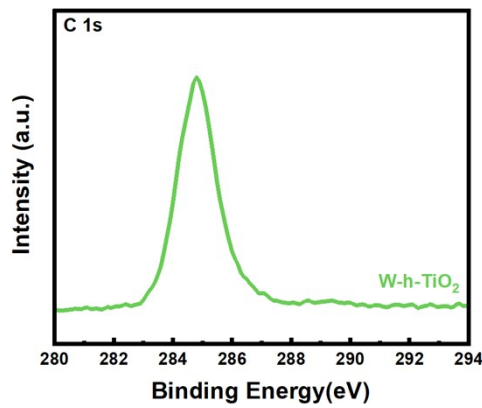

Fig. S6. C 1s XPS spectrum of W-h-TiO<sub>2</sub> nanosheets.

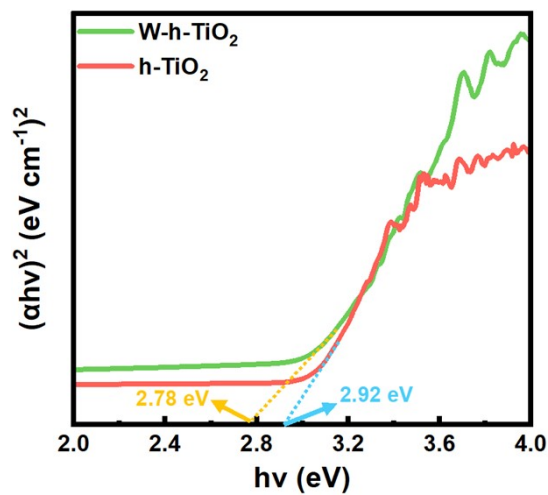

Fig. S7. Optical bandgap of pure h-TiO<sub>2</sub> and W-h-TiO<sub>2</sub> nanosheets.

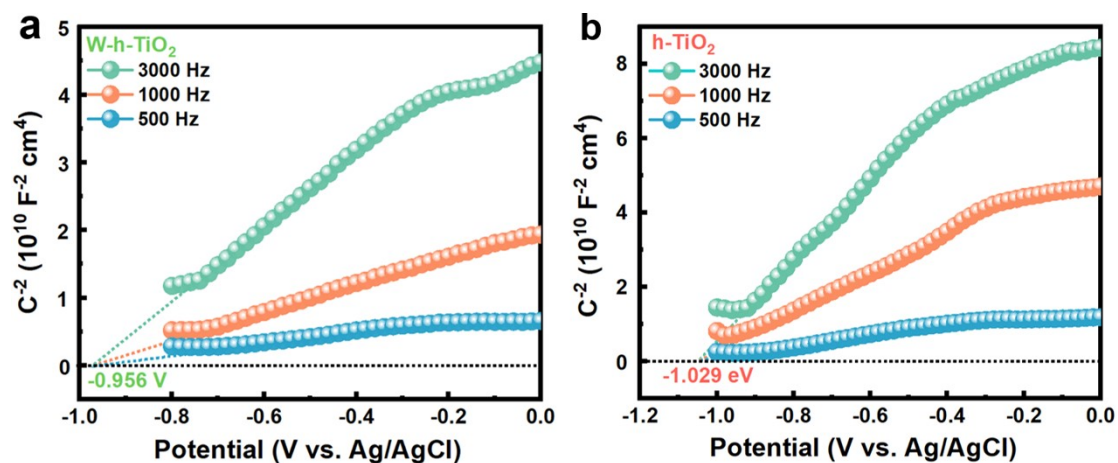

Fig. S8. Mott-Schottky plots under different frequency of (a) W-h-TiO<sub>2</sub> nanosheets and (b) pure h-TiO<sub>2</sub> nanosheets.

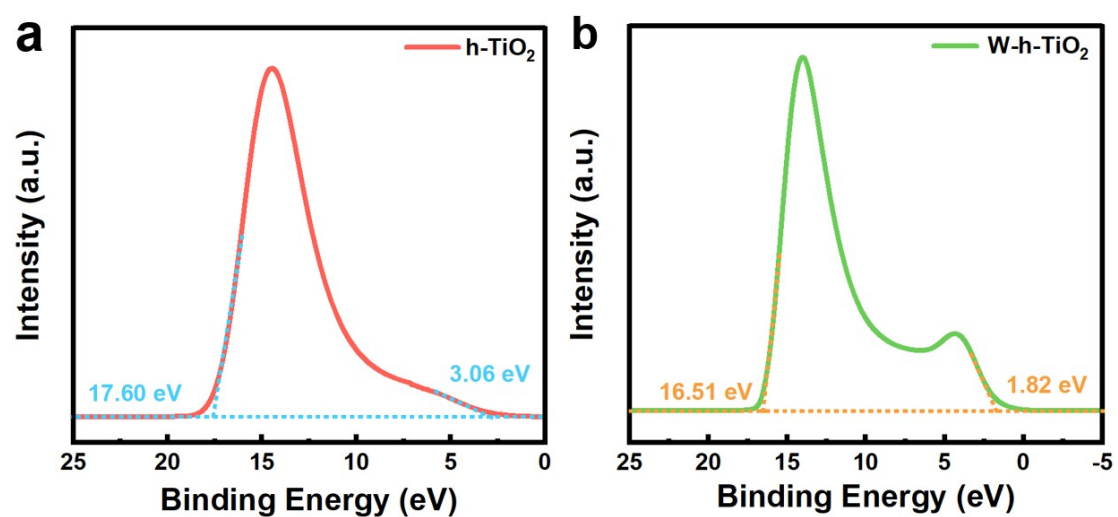

Fig. S9. UPS spectra of (a) h-TiO<sub>2</sub> nanosheets and (b) W-h-TiO<sub>2</sub> nanosheets.

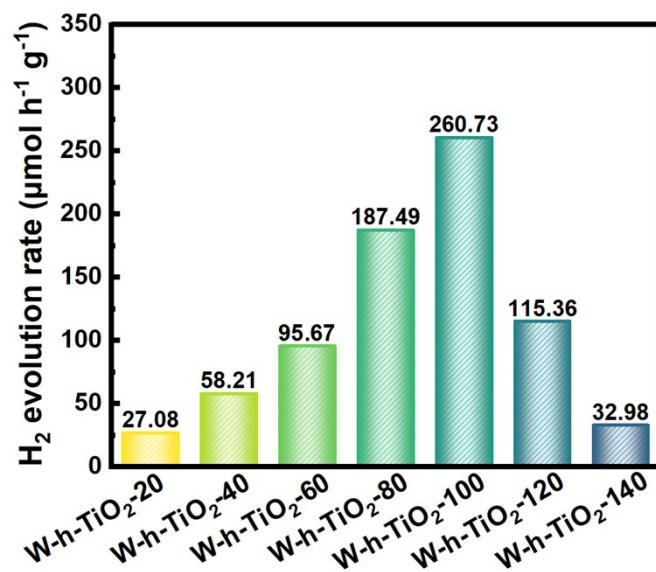

**Fig. S10.** H<sub>2</sub> evolution rates of W-h-TiO<sub>2</sub> nanosheets under a constant temperature of 25 °C.

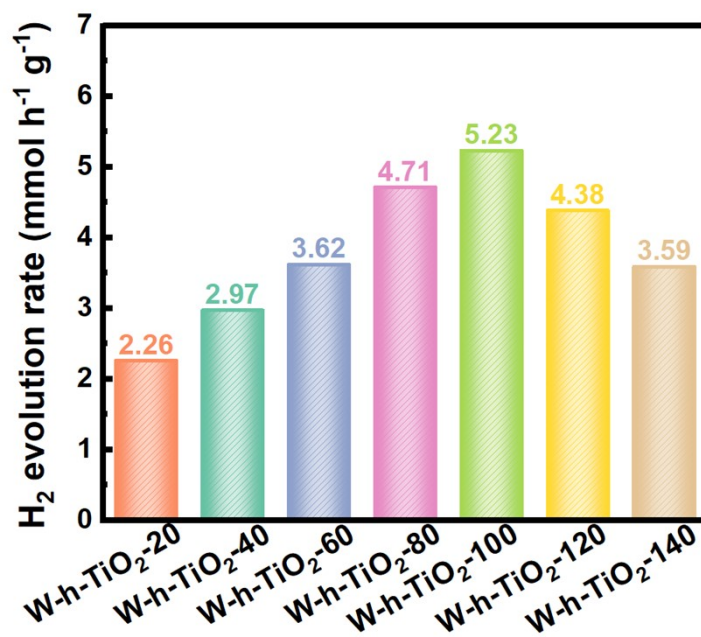

**Fig. S11.** H<sub>2</sub> evolution rates of W-h-TiO<sub>2</sub> nanosheets with 0.5wt% H<sub>2</sub>PtCl<sub>6</sub> as cocatalyst.

**Table S1.** Actual molar ratio of W to Ti in W-h-TiO<sub>2</sub> nanosheets measured by ICP-OES.

| Samples                   | molar ratio of W to Ti |
|---------------------------|------------------------|
| W-h-TiO <sub>2</sub> -20  | 0.27%                  |
| W-h-TiO <sub>2</sub> -40  | 0.58%                  |
| W-h-TiO <sub>2</sub> -60  | 0.93%                  |
| W-h-TiO <sub>2</sub> -80  | 1.35%                  |
| W-h-TiO <sub>2</sub> -100 | 1.77%                  |
| W-h-TiO <sub>2</sub> -120 | 2.18%                  |
| W-h-TiO <sub>2</sub> -140 | 2.69%                  |

**Table S2.** Time-resolved PL decay curve parameters obtained by double-exponential function simulation.

| samples              | $\tau_1$ (ns) | $\tau_2$ (ns) | A <sub>1</sub> (%) | A <sub>2</sub> (%) | $\tau_{ave}$ (ns) |
|----------------------|---------------|---------------|--------------------|--------------------|-------------------|
| h-TiO <sub>2</sub>   | 2.71          | 22.61         | 85.92              | 14.08              | 5.52              |
| W-h-TiO <sub>2</sub> | 3.97          | 58.36         | 67.62              | 32.38              | 21.58             |

**Table S3.** Photocatalytic hydrogen production performance of photocatalysts reported in literatures.

| Photocatalysts                                      | H <sub>2</sub> (mmol/g/h) | Illumination                       | Sacrificial agent                                                          | Ref.                 |
|-----------------------------------------------------|---------------------------|------------------------------------|----------------------------------------------------------------------------|----------------------|
| Ru-TiO <sub>2</sub>                                 | 0.85                      | 300 W Xe lamp<br>(AM 1.5G)         | 3wt% Ru and 20 mL<br>CH <sub>3</sub> OH                                    | 1                    |
| Pt/Ga-TiO <sub>2</sub>                              | 5.122                     | 300 W Xe lamp<br>(AM 1.5G)         | 0.5wt% H <sub>2</sub> PtCl <sub>6</sub> and<br>20 mL CH <sub>3</sub> OH    | 2                    |
| Fe-Ni/Ag/TiO <sub>2</sub>                           | 0.793                     | 300 W Xe lamp<br>(AM 1.5G)         | 20 mL CH <sub>3</sub> OH                                                   | 3                    |
| S-TiO <sub>2</sub>                                  | 163.9                     | 300 W Xe lamp<br>(AM 1.5G)         | 20 mL CH <sub>3</sub> OH                                                   | 4                    |
| N-TiO <sub>2</sub> /Pt                              | 0.57                      | 300 W Xe lamp<br>(AM 1.5G)         | 20 mL CH <sub>3</sub> OH                                                   | 5                    |
| Ni/TiO <sub>2</sub>                                 | 3.39                      | 300 W Xe lamp<br>(AM 1.5G)         | 1wt% H <sub>2</sub> PtCl <sub>6</sub> and 20<br>mL CH <sub>3</sub> OH      | 6                    |
| Cu-mpTiO <sub>2</sub>                               | 1.00                      | 300 W Xe lamp<br>(AM 1.5G)         | 1wt% H <sub>2</sub> PtCl <sub>6</sub> and 20<br>mL CH <sub>3</sub> OH      | 7                    |
| <b>1T-WS<sub>2</sub>/2H-<br/>WS<sub>2</sub>/CdS</b> | <b>5.23</b>               | <b>300 W Xe lamp<br/>(AM 1.5G)</b> | <b>0.5wt% H<sub>2</sub>PtCl<sub>6</sub> and<br/>20 mL CH<sub>3</sub>OH</b> | <b>This<br/>work</b> |



## References

1. W. Ouyang, M. J. Munoz-Batista, A. Kubacka, R. Luque, M. Fernández-García, Enhancing photocatalytic performance of TiO<sub>2</sub> in H<sub>2</sub> evolution via Ru co-catalyst deposition, *Appl. Catal. B*, 2018, **238**, 434-443.
2. S. Luo, T. D. Nguyen-Phan, D. Vovchok, I. Waluyo, R. M. Palomino, A. D. Gamliski, L. Barrio, W. Xu, D.E. Polyansky, J.A. Rodriguez, Enhanced, robust light-driven H<sub>2</sub> generation by gallium-doped titania nanoparticles, *Phys. Chem. Chem. Phys.*, 2018, **20**, 2104-2112.
3. T. Sun, E. Z. Liu, X. H. Liang, X. Y. Hu, J. Fan, Enhanced hydrogen evolution from water splitting using Fe-Ni codoped and Ag deposited anatase TiO<sub>2</sub> synthesized by solvothermal method, *Appl. Surf. Sci.*, 2015, **347**, 696-705.
4. Z. P. Xing, Z. Z. Li, X. Y. Wu, G. F. Wang, W. Zhou, In-situ S-doped porous anatase TiO<sub>2</sub> nanopillars for high-efficient visible-light photocatalytic hydrogen evolution, *Int. J. Hydrogen Energy*, 2016, **41**, 1535-1541.
5. B. S. Huang, M. Y. Wey, Properties and H<sub>2</sub> production ability of Pt photodeposited on the anatase phase transition of nitrogen-doped titanium dioxide, *Int. J. Hydrogen Energy*, 2011, **36**, 9479-9486.
6. F. Wu, X. Y. Hu, J. Fan, E. Z. Liu, T. Sun, L. M. Kang, W. Q. Hou, C. J. Zhu, H. C. Liu, Photocatalytic activity of Ag/TiO<sub>2</sub> nanotube arrays enhanced by surface plasmon resonance and application in hydrogen evolution by water splitting, *Plasmonics*, 2013, **8**, 501-508.
7. R. A. Rather, S. Singh, B. Pal, A Cu<sup>+1</sup>/Cu<sup>0</sup>-TiO<sub>2</sub> mesoporous nanocomposite exhibits improved H<sub>2</sub> production from H<sub>2</sub>O under direct solar irradiation, *J. Catal.*, 2017, **346**, 1-9.
